# Supplementary material
Source: publisher figshare collection journal article supplement (https://rs.figshare.com/ndownloader/files/9479011)
Supplement: Supplementary file 1 [file 9479011]

**Upper limits to body size imposed by respiratory-structural trade-offs in Antarctic pycnogonids**

Lane, SJ, CM Shishido, AL Moran, BW Tobalske, CP Arango, HA Woods

Proceedings of the Royal Society B

DOI: 10.1098/rspb.2017.1779

**Figure S2.**


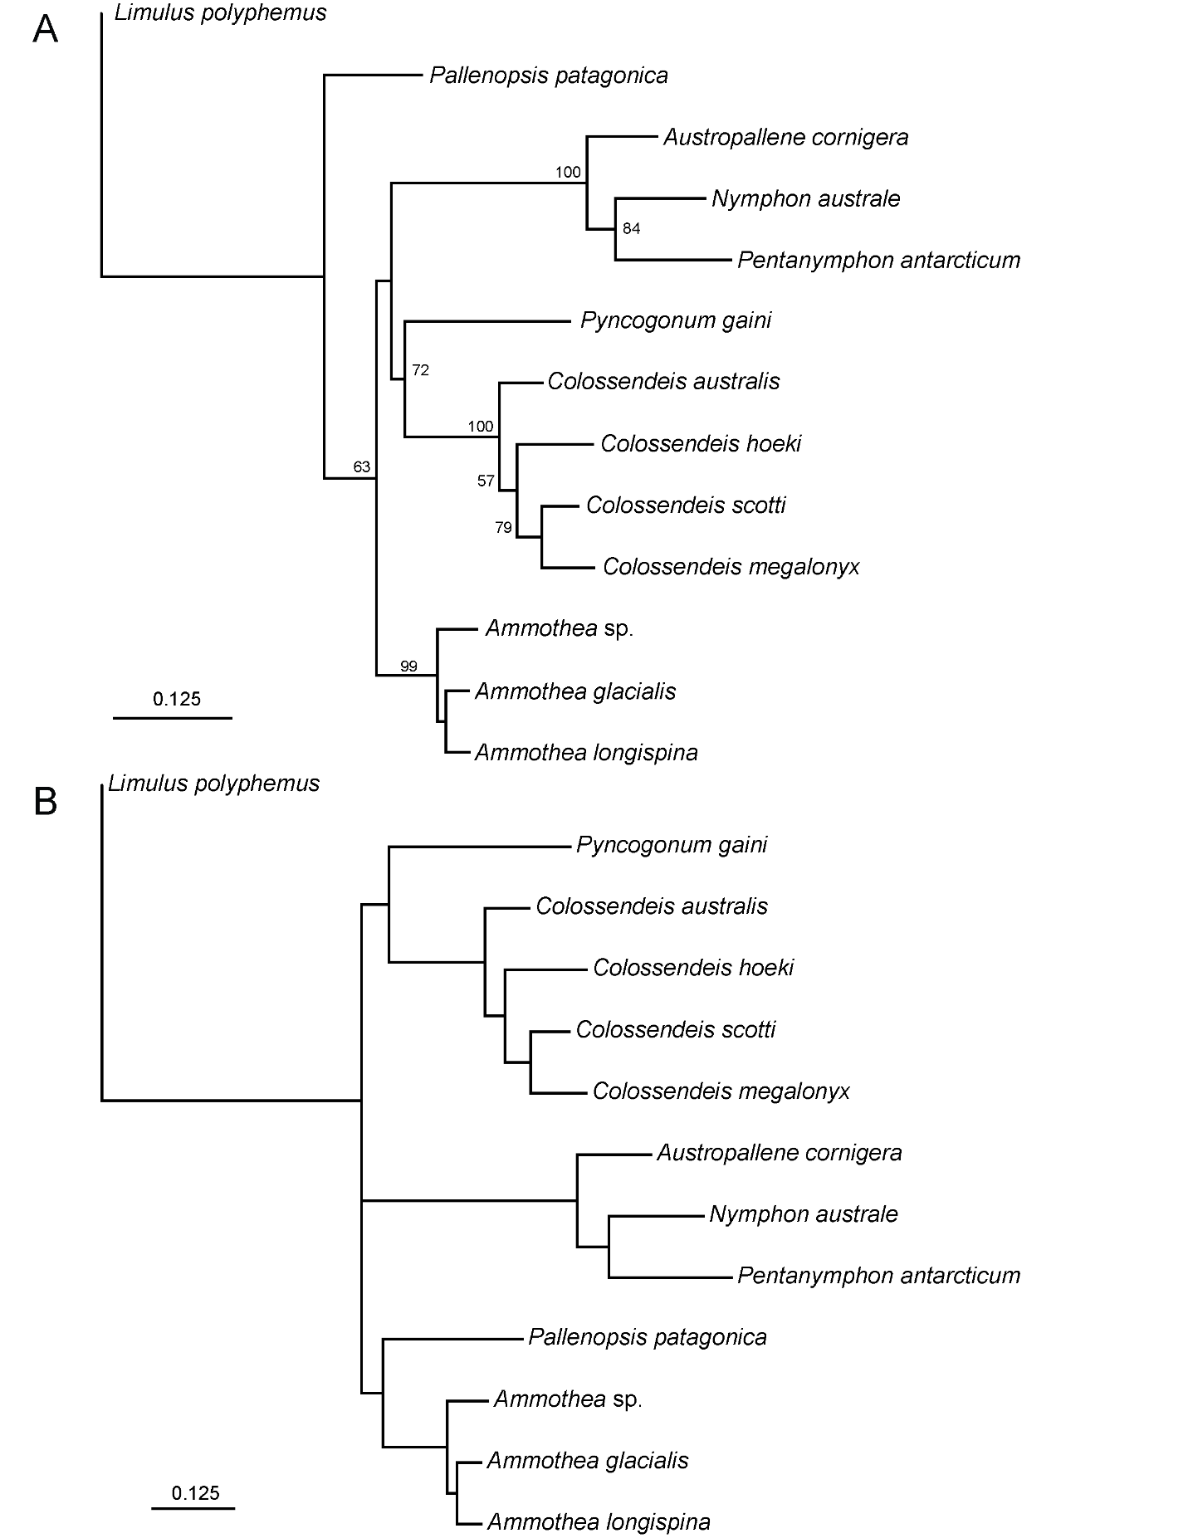


**Figure S2.** Maximum likelihood trees using CO1 sequence data. A) Unconstrained topology, values along branches indicate bootstrap values (in percent). Only values above 50% are shown. Bar represents 0.125 substitutions per site. B) Constrained tree following topology of Arango and Wheeler (32). See text for details.
